# Supplementary material for: Targeting Stage-Specific Embryonic Antigen 4 (SSEA-4) in Triple Negative Breast Cancer by CAR T Cells Results in Unexpected on Target/off Tumor Toxicities in Mice
Source: MDPI journal article supplement (doi:10.3390/ijms24119184), 2023-05-24
Supplement: s1 [file s1]

## Supplements

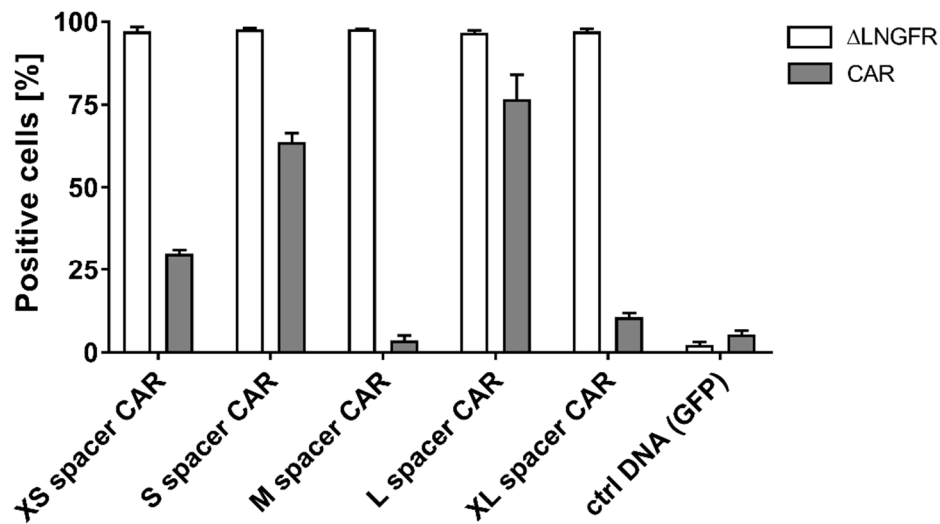

**Figure S1: Expression of  $\Delta$ LNGFR and second generation XS, S, M, L, and XL spacer CAR variants on HEK293T cell surface.** Transfer vector DNA was introduced transiently into HEK293T cells by lipofection and flow cytometric analysis was performed 48 hours later. Expression of  $\Delta$ LNGFR was detected by mAb staining, while that of CARs by Protein L staining. Both detection reagents were used in biotinylated form and fluorescence tagging was performed by secondary  $\alpha$ -Biotin-APC mAb labeling. A GFP-encoding vector served as control. Results are the average of 3 independent experiments.

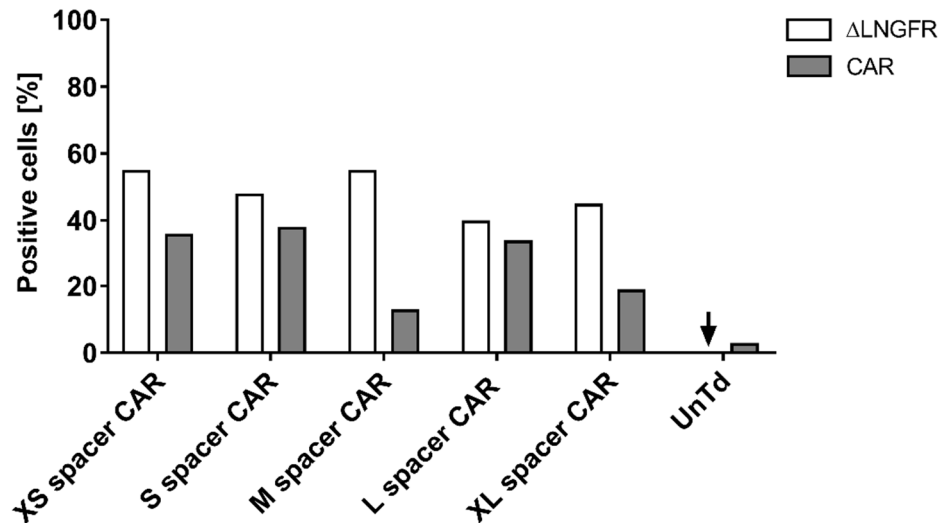

**Figure S2: Expression of  $\Delta$ LNGFR and second generation XS, S, M, L, and XL spacer CAR variants on T cell surface.** Naïve Pan T cells were isolated from PBMCs and cultured in the presence of IL-2 and the T cell stimulating matrix TransAct. For permanent receptor expression, the lymphocytes were transduced lentivirally with an MOI of 1.5 and expanded in IL-2 (40 IU/mL). Surface transgene expression was determined by flow cytometry 5 days after transduction and 4 days after TransAct removal, respectively. Expression of  $\Delta$ LNGFR was assessed by mAb-based staining, while Protein L staining was applied to analyze CAR expression. Both detection reagents were used as biotin-conjugates and fluorescence marking was achieved by secondary labeling with  $\alpha$ -Biotin-APC mAb. The results of one experiment are displayed. UnTd, untransduced.

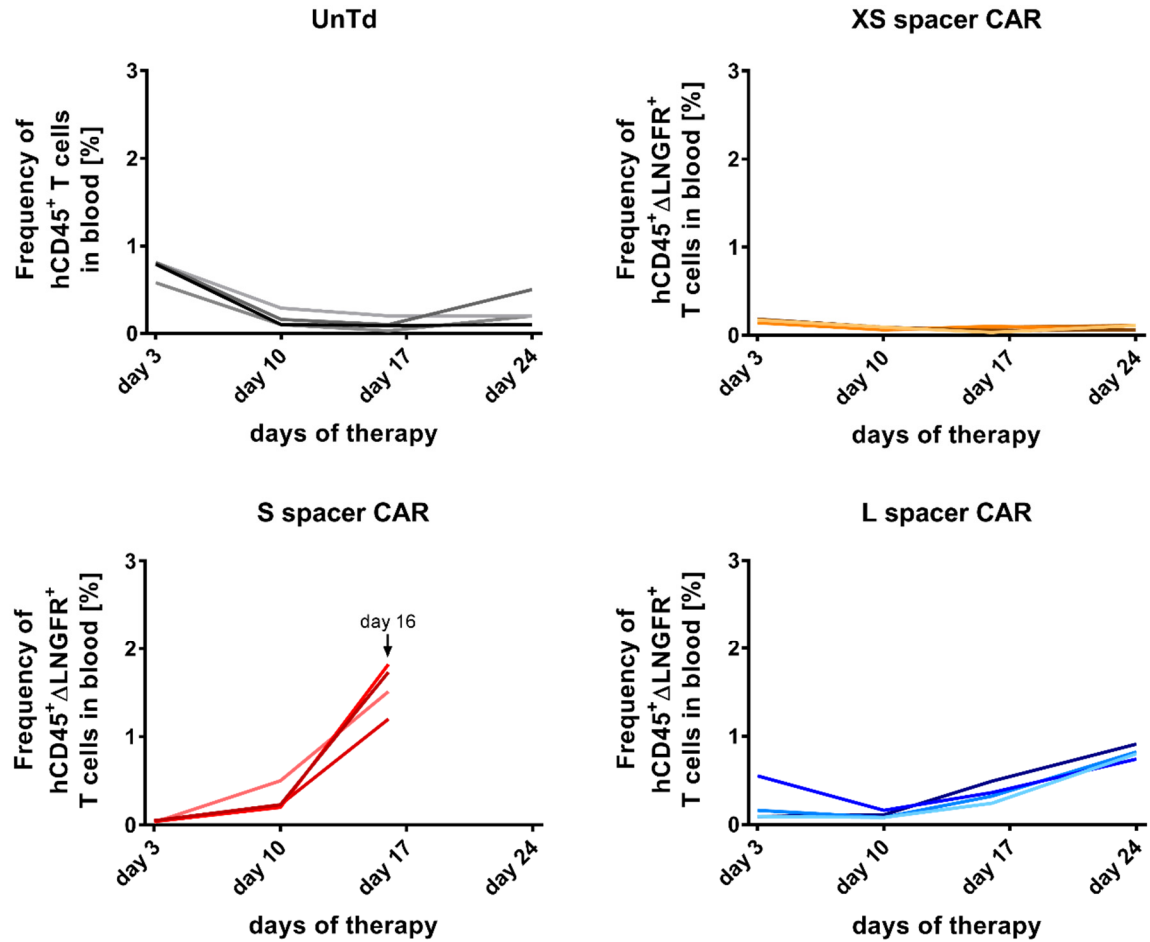

**Figure S3: Frequency of CAR (human CD45<sup>+</sup>ΔLNGFR<sup>+</sup>) and untransduced (human CD45<sup>+</sup>) control T cells in mouse peripheral blood over the course of therapy.** Female NSG mice with established s.c. MDA-MB-231 were injected i.v. with 2x10<sup>6</sup> XS, S, and L spacer CAR T cells and starting day 3 post adoptive transfer their frequency in peripheral blood was monitored by flow cytometry. For injection of untransduced control T cells, cell number was adjusted to the highest total T cell number injected in the CAR T cell groups. Each line represents one mouse.

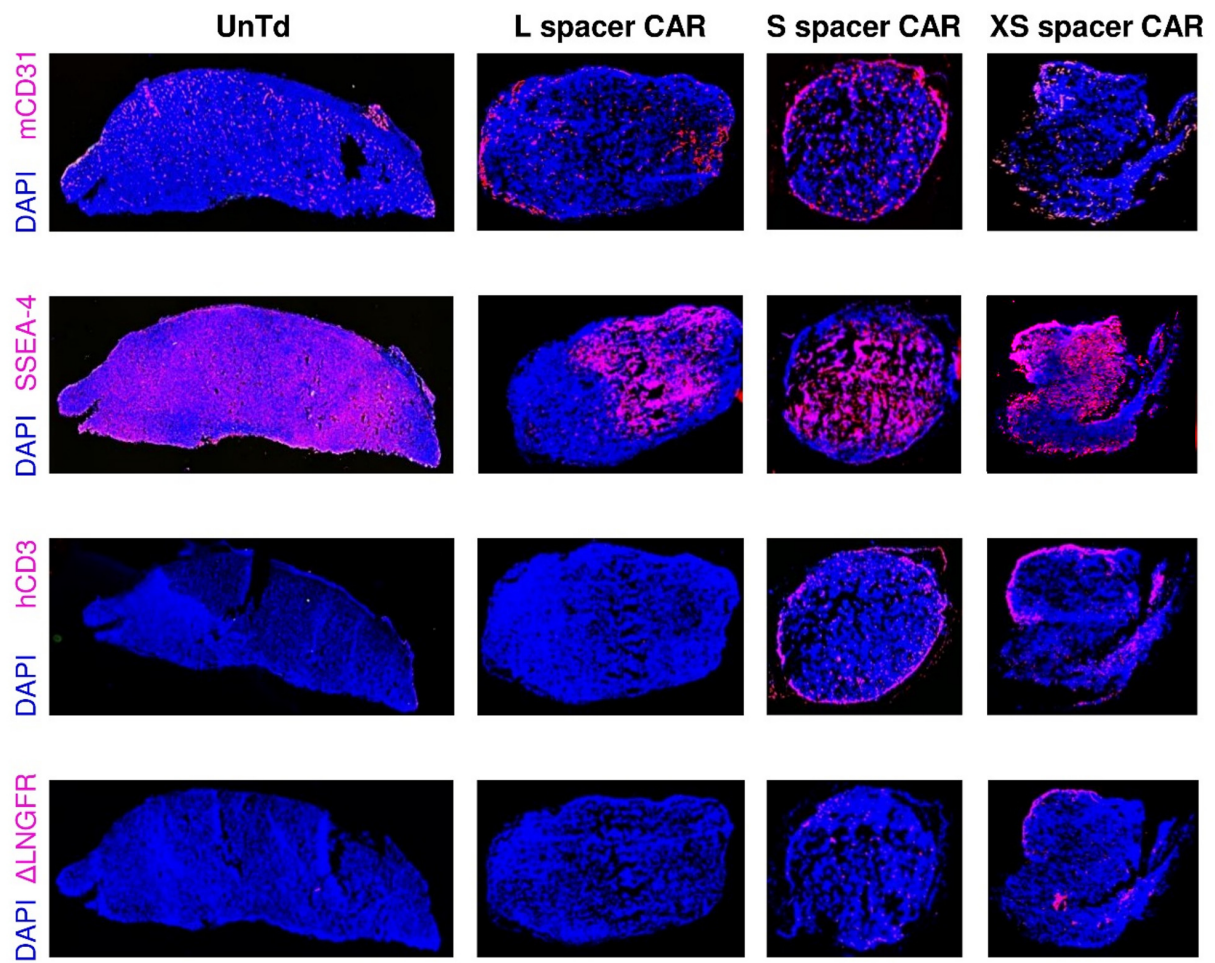

**Figure S4: Characterization of MBA-MB-231 xenograft tumors from NSG mice after treatment with L, S, XS spacer CAR or untransduced controls T cells.** All images were acquired from tumors treated with  $2 \times 10^6$  CAR T cells using a 4x objective lens and are representative for 2 tumors analyzed per group. Pink: mouse CD31, SSEA-4, human CD3, or  $\Delta$ LNGFR; blue: DAPI.
